# Supplementary material for: The Bioactive Substances in Spent Black Tea and Arabic Coffee Could Improve the Nutritional Value and Extend the Shelf Life of Sponge Cake after Fortification
Source: PubMed Central journal article supplement — ACS Omega. 2023 Sep 11;8(37):33593–609. doi: 10.1021/acsomega.3c03747 (PMC10515411; doi:10.1021/acsomega.3c03747), 2023-09-11
Supplement: ao3c03747_si_001.pdf [file ao3c03747_si_001.pdf]

# **The bioactive substances in spent black tea and Arabic coffee could improve the nutritional value and extend the shelf-life of sponge cake after fortification**

**Abdelrahman R. Ahmed<sup>1,2\*</sup>, Nashi K. Alqahtani<sup>1</sup>, Khaled M. A. Ramadan<sup>3,4\*</sup>, Heba I. Mohamed<sup>5</sup>, Mohamed A. A. Mahmoud<sup>4\*</sup>, Haiam O. Elkatry<sup>1,2</sup>**

<sup>1</sup> Food and Nutrition Science Department, Agricultural Science and Food, King Faisal University, Al-Ahsa 31982, Saudi Arabia; [arahmed@kfu.edu.sa](mailto:arahmed@kfu.edu.sa) (A.R.A.); [nelqahtani@kfu.edu.sa](mailto:nelqahtani@kfu.edu.sa) (N.K.A.); [helkatary@kfu.edu.sa](mailto:helkatary@kfu.edu.sa) (H.O.K.)

<sup>2</sup> Home Economics Department, Faculty of Specific Education, Ain Shams University, Abassia, Cairo 11772, Egypt

<sup>3</sup> Central Laboratories, Department of Chemistry, King Faisal University, Al-Ahsa 31982, Saudi Arabia; [kramadan@kfu.edu.sa](mailto:kramadan@kfu.edu.sa) (K.M.A.R.)

<sup>4</sup> Department of Agricultural Biochemistry, Faculty of Agriculture, Ain Shams University, P.O. Box 68, Hadayek Shobra, Cairo 11241, Egypt; [mohamed\\_mahmoud1@agr.asu.edu.eg](mailto:mohamed_mahmoud1@agr.asu.edu.eg) (M.A.A.M.)

<sup>5</sup> Biological and Geological Sciences Department, Faculty of Education, Ain Shams University, Cairo 11341, Egypt; [hebaibrahim79@gmail.com](mailto:hebaibrahim79@gmail.com) (H.I.M.)

**Submitted to ACS OMEGA**

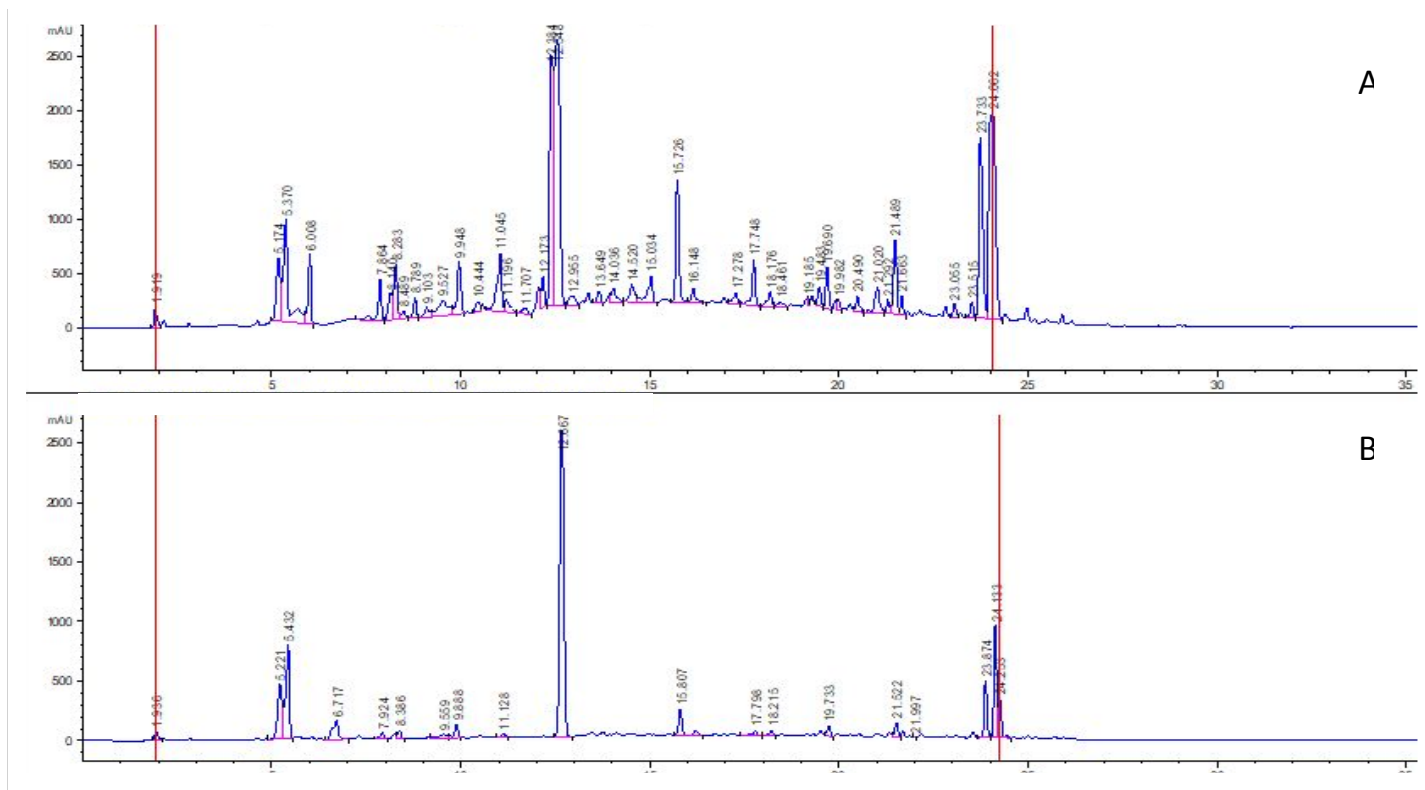

**Figure S1.** Chromatogram of polyphenolic compounds of tea powder extract (A) and spent tea powder extract (B).

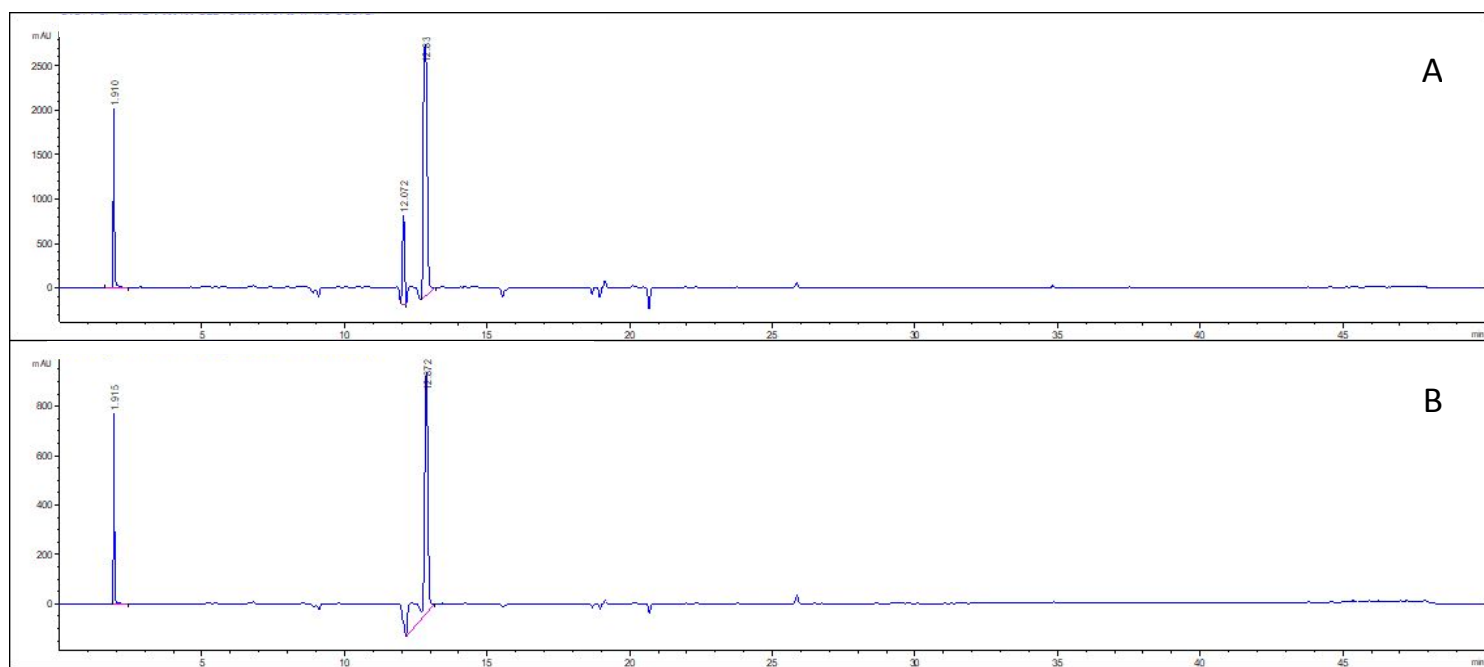

**Figure S2.** Chromatogram of polyphenolic compounds of coffee powder extract (A) and spent coffee powder extract (B).

**Table S1.** Total bacterial and mold and yeast count per log cfu/gm in sponge cake fortified with different levels of spent coffee or tea during different storage periods. According to Duncan's test at  $p \leq 0.05$ , the different letters represent the significance inside each column.

| Category    | Total count<br>(log cfu/gm) | Mold and yeast<br>(log cfu/gm) |
|-------------|-----------------------------|--------------------------------|
| Control-0d  | 1.837 k                     | 0.000 l                        |
| Control-7d  | 2.943 bc                    | 2.443 c                        |
| Control-14d | 3.433 a                     | 2.857 a                        |
| C-STP1-0d   | 1.670 l                     | 0.000 l                        |
| C-STP1-7d   | 2.763 de                    | 2.213 e                        |
| C-STP1-14d  | 2.827 cde                   | 2.620 b                        |
| C-STP2-0d   | 1.530 lm                    | 0.000 l                        |
| C-STP2-7d   | 2.670 ef                    | 2.110 g                        |
| C-STP2-14d  | 3.017 b                     | 2.433 c                        |
| C-STP3-0d   | 1.440 mn                    | 0.000 l                        |
| C-STP3-7d   | 2.327 i                     | 1.840 j                        |
| C-STP3-14d  | 2.530 fgh                   | 2.173 f                        |
| C-SCP1-0d   | 1.417 mn                    | 0.000 l                        |
| C-SCP1-7d   | 2.547 fg                    | 2.027 h                        |
| C-SCP1-14d  | 2.877 bcd                   | 2.643 b                        |
| C-SCP2-0d   | 1.327 n                     | 0.000 l                        |
| C-SCP2-7d   | 2.423 ghi                   | 1.940 i                        |
| C-SCP2-14d  | 2.750 de                    | 2.333 d                        |
| C-SCP3-0d   | 1.270 n                     | 0.000 l                        |
| C-SCP3-7d   | 2.167 j                     | 1.760 k                        |
| C-SCP3-14d  | 2.367 hi                    | 2.060 h                        |

*C-SCP1, C-SCP2, and C-SCP3: cakes with the addition of 1, 2 and 3% spent coffee powder; C-STP1, C-STP2, and C-STP3: cakes with the addition of 1, 2 and 3% spent tea powder.*
